# Supplementary material for: Daily-Living Freezing of Gait as Quantified Using Wearables in People With Parkinson Disease: Comparison With Self-Report and Provocation Tests
Source: PubMed Central journal article supplement — Phys Ther. 2022 Sep 30;102(12):pzac129. doi: 10.1093/ptj/pzac129 (PMC10071496; doi:10.1093/ptj/pzac129), 2022-09-30
Supplement: ptj-2021-0969_r2_suppl_figure_1_pzac129.pdf [file ptj-2021-0969_r2_suppl_figure_1_pzac129.pdf]

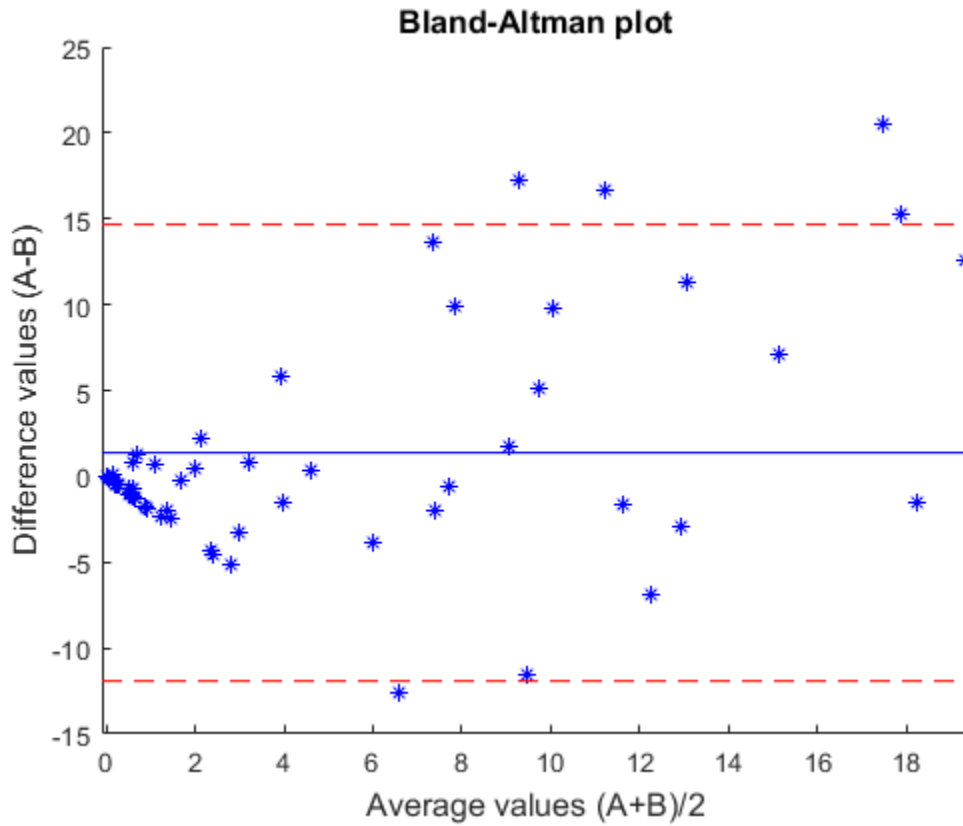

**Supplementary Figure 2.** Bland Altman plot.

The bold line is the mean difference (bias), with a value of 1.37. The dashed lines are the 95% upper and lower limits of agreement, with values, respectively, of 14.67 and -11.93
