# Supplementary material for: Daily-Living Freezing of Gait as Quantified Using Wearables in People With Parkinson Disease: Comparison With Self-Report and Provocation Tests
Source: PubMed Central journal article supplement — Phys Ther. 2022 Sep 30;102(12):pzac129. doi: 10.1093/ptj/pzac129 (PMC10071496; doi:10.1093/ptj/pzac129), 2022-09-30
Supplement: ptj-2021-0969_r2_suppl_figure_2_pzac129.pdf [file ptj-2021-0969_r2_suppl_figure_2_pzac129.pdf]

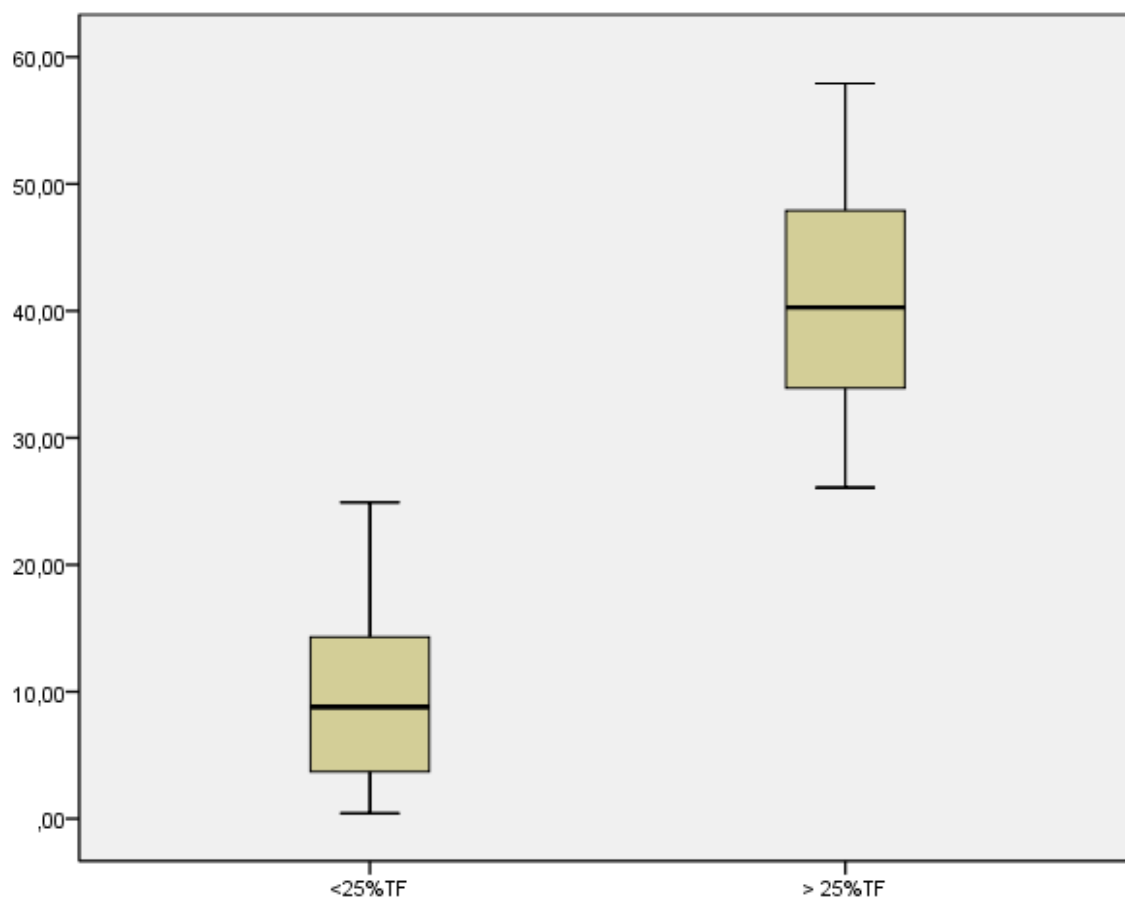

**Supplementary Figure 1.** Boxplot FOG provoking protocol %TF OFF medication state in mild (<25 %TF) and moderate (>25 %TF) Freezers. The Y axis represents %TF.  
FOG: Freezing of Gait; %TF: % time frozen.
