# Supplementary material for: Daily-Living Freezing of Gait as Quantified Using Wearables in People With Parkinson Disease: Comparison With Self-Report and Provocation Tests
Source: PubMed Central journal article supplement — Phys Ther. 2022 Sep 30;102(12):pzac129. doi: 10.1093/ptj/pzac129 (PMC10071496; doi:10.1093/ptj/pzac129), 2022-09-30
Supplement: ptj-2021-0969_r2_suppl_table_1_pzac129.pdf [file ptj-2021-0969_r2_suppl_table_1_pzac129.pdf]

**Supplementary Table 1. Inclusion and Exclusion Criteria<sup>a</sup>**

| Inclusion criteria                                                                                                                                                                                                                                                                                                                                                                                                                                                                                                                                                                                                                                    | Exclusion criteria                                                                                                                                                                                                                                                                                                                                                                                                                                                                                                                                                                                                                                                                                                                                                                                                                                                                                                                                                                 |
|-------------------------------------------------------------------------------------------------------------------------------------------------------------------------------------------------------------------------------------------------------------------------------------------------------------------------------------------------------------------------------------------------------------------------------------------------------------------------------------------------------------------------------------------------------------------------------------------------------------------------------------------------------|------------------------------------------------------------------------------------------------------------------------------------------------------------------------------------------------------------------------------------------------------------------------------------------------------------------------------------------------------------------------------------------------------------------------------------------------------------------------------------------------------------------------------------------------------------------------------------------------------------------------------------------------------------------------------------------------------------------------------------------------------------------------------------------------------------------------------------------------------------------------------------------------------------------------------------------------------------------------------------|
| <ul style="list-style-type: none"><li>- Clinical diagnosis of PD according to the UK PD Society Brain Bank criteria<sup>17</sup></li><li>- Modified Hoehn &amp; Yahr Stage I to IV in the ON state</li><li>- Age between 40 and 90 years</li><li>- Mini Mental State Examination (MMSE) score of <math>\geq 21</math> or <math>&gt; 16</math> on the 26-item MMSE screening</li><li>- Stable PD medication during the previous month</li><li>- Self-reported FOG severity of at least one FOG episode per day, irrespective of FOG occurring ON- or OFF-medication</li><li>- Observed FOG during the provoking protocol in baseline testing</li></ul> | <ul style="list-style-type: none"><li>- Participation in another clinical study or usage of cueing devices</li><li>- A fall frequency of more than once a day</li><li>- Acute musculoskeletal, cardiovascular, other neurological or any other medical condition affecting gait</li><li>- Occurrence of any of the following within 3 months prior to informed consent: orthopedic surgery of the lower extremity, myocardial infarction, hospitalization for unstable angina, coronary artery bypass graft, percutaneous coronary intervention, implantation of a cardiac resynchronization therapy device, implantation of deep brain stimulation</li><li>- Substance abuse, major depressive disorder or clinical apathy that affects daily walking activity or may interfere with the patient's compliance</li><li>- Inability to walk without a rollator indoors</li><li>- Use of a duodopa pump or apomorphine injections, jeopardizing OFF-medication assessments</li></ul> |

<sup>a</sup> FOG: Freezing of Gait; PD: Parkinson disease.

<sup>17</sup>Hughes AJ, Daniel SE, Kilford L, Lees AJ. Accuracy of clinical diagnosis of idiopathic Parkinson's disease: a clinico-pathological study of 100 cases. *J Neurol Neurosurg Psychiatry* 1992;**55(3)**:181–4.
