# Supplementary material for: Daily-Living Freezing of Gait as Quantified Using Wearables in People With Parkinson Disease: Comparison With Self-Report and Provocation Tests
Source: PubMed Central journal article supplement — Phys Ther. 2022 Sep 30;102(12):pzac129. doi: 10.1093/ptj/pzac129 (PMC10071496; doi:10.1093/ptj/pzac129), 2022-09-30
Supplement: ptj-2021-0969_r2_suppl_table_2_pzac129.pdf [file ptj-2021-0969_r2_suppl_table_2_pzac129.pdf]

**Supplementary Table 2.** Comparison of Participants With Mild and Moderate Amounts of Total %TF During the Provoking Protocol OFF Medication and During the Unsupervised Daily-Living Activities Measured With the DeFOG System

|                                                           | Variable                                 | Provoking protocol OFF medication           |                                                  |                 | Unsupervised home-monitoring               |                                                |                 |
|-----------------------------------------------------------|------------------------------------------|---------------------------------------------|--------------------------------------------------|-----------------|--------------------------------------------|------------------------------------------------|-----------------|
|                                                           |                                          | Participants with mild FOG (<25%TF)* (n=14) | Participants with moderate FOG (>25% TF)* (n=14) | p-value         | Participants with mild FOG (<1%TF)* (n=14) | Participants with moderate FOG (>1%TF)* (n=14) | p-value         |
| Participant characteristics and disease severity          | Age (years)                              | 71.00 (65.00-72.75)                         | 69.50 (64.50-76.25)                              | 0.63            | 70.00 (62.00-75.25)                        | 71.00 (66.75-72.75)                            | 0.71            |
|                                                           | Gender (% female)                        | 28.6                                        | 28.6                                             | 1.00            | 14.29                                      | 14.29                                          | 1.00            |
|                                                           | Disease duration (years)                 | 12.50 (7.75-16.50)                          | 12.50 (7.00-18.75)                               | 0.59            | 9.50 (3.50-21.25)                          | 13.50 (9.50-16.00)                             | 0.93            |
|                                                           | MDS-UPDRS part III OFF                   | 45.00 (35.00-51.50)                         | 48.50 (35.25-52.25)                              | 0.64            | 47.00 (35.00-52.00)                        | 44.00 (34.00-53.00)                            | 0.68            |
|                                                           | MDS-UPDRS part III ON                    | 2.00 (0.00-2.00)                            | 2.00 (0.00-3.00)                                 | 0.14            | 36.00 (30.75-38.00)                        | 32.00 (21.75-44.75)                            | 0.68            |
|                                                           | MDS-UPDRS III OFF item 3.11. FOG         | 31.50 (24.75-37.25)                         | 37.00 (31.00-47.00)                              | 0.38            | <b>1.00 (0.00-2.00)</b>                    | <b>2.00 (1.00-3.00)</b>                        | <b>0.01</b>     |
|                                                           | MDS-UPDRS III ON item 3.11 FOG           | 0.00 (0.00-2.00)                            | 1.50 (0.75-2.00)                                 | 0.06            | 1.50 (0.00-2.00)                           | 1.00 (0.00-2.00)                               | 0.55            |
|                                                           | Gait speed during 4-meter walk (m/sec)   | 1.04 (0.87-1.18)                            | 1.06 (0.86-1.18)                                 | 0.63            | 1.00 (0.81-1.14)                           | 1.15 (0.91-1.21)                               | 0.38            |
|                                                           | LEDD (mg/day)                            | 832.50 (553.00-1076.50)                     | 787.50 (299.75-1498.13)                          | 0.96            | <b>546.00 (288.00-1035.00)</b>             | <b>887.00 (801.00-1235.00)</b>                 | <b>0.02</b>     |
| Unsupervised home monitoring                              | % TF during monitoring                   | 1.2 (0.5-3.7)                               | 0.83 (0.6-2.8)                                   | 0.93            | <b>0.6 (0.5-0.7)</b>                       | <b>2.8 (1.8-3.7)</b>                           | <b>≤0.001**</b> |
|                                                           | Number of FOG episodes                   | 528.00 (448.25-918.50)                      | 442.50 (179.75-1035.50)                          | 0.41            | <b>380.50 (101.00-522.25)</b>              | <b>853.50 (614.25-1491.25)</b>                 | <b>≤0.001**</b> |
|                                                           | Number of FOG episodes per hour          | 20.01 (8.76-54.90)                          | 14.81 (10.52-38.02)                              | 0.85            | <b>10.15 (8.56-12.81)</b>                  | <b>38.44 (27.45-54.90)</b>                     | <b>≤0.001**</b> |
|                                                           | Daily usage home monitoring device (min) | 202.20 (186.25-354.94)                      | 303.67 (174.51-353.26)                           | 0.84            | 333.09 (180.73-368.21)                     | 212.73 (183.75-295.44)                         | 0.41            |
| Amount of FOG during supervised FOG-provoking tests (%TF) | 4-meter walk OFF                         | 0.0 (0.0-4.0)                               | 0.00 (0.0-6.7)                                   | 0.66            | <b>0.0 (0.0-0.0)</b>                       | <b>1.9 (0.0-20.6)</b>                          | <b>0.05</b>     |
|                                                           | TUG single task OFF                      | 6.8 (0.0-11.3)                              | 0.8 (0.0-8.6)                                    | 0.83            | 0.0 (0.0-3.9)                              | 5.1 (0.0-20.8)                                 | 0.07            |
|                                                           | TUG with dual-task OFF                   | 0.0 (0.0-18.5)                              | 1.6 (0.0-6.4)                                    | 0.59            | <b>0.0 (0.0-1.1)</b>                       | <b>7.0 (0.0-41.9)</b>                          | <b>0.01</b>     |
|                                                           | Turning task single task OFF             | <b>5.1 (0.0-16.8)</b>                       | <b>58.2 (31.2-79.4)</b>                          | <b>≤0.001**</b> | 21.9 (4.4-62.7)                            | 21.2 (5.3-60.6)                                | 0.95            |
|                                                           | Turning task with dual-task OFF          | <b>5.4 (0.0-18.9)</b>                       | <b>69.2 (42.9-83.6)</b>                          | <b>≤0.001**</b> | 25.1 (0.0-58.9)                            | 27.3 (3.4-80.6)                                | 0.61            |
|                                                           | Hotspot narrow space OFF                 | 0.9 (0.0-21.5)                              | 11.4 (0.0-32.7)                                  | 0.38            | <b>0.0 (0.0-10.2)</b>                      | <b>21.6 (1.3-34.8)</b>                         | <b>0.01</b>     |

|                                                                            |                                                |                              |                               |                 |                       |                        |      |
|----------------------------------------------------------------------------|------------------------------------------------|------------------------------|-------------------------------|-----------------|-----------------------|------------------------|------|
|                                                                            | Personal Hotspot OFF                           | <b>5.6 (0.0-11.3)</b>        | <b>28.3 (17.6-41.0)</b>       | <b>0.02**</b>   | 7.1 (0.0-21.7)        | 28.0 (8.7-39.5)        | 0.11 |
|                                                                            | %TF total provoking protocol OFF               | <b>8.8 (3.5-14.4)</b>        | <b>40.3 (32.9-48.9)</b>       | <b>≤0.001**</b> | 29.0 (5.5-40.1)       | 21.6 (11.0-47.6)       | 0.63 |
|                                                                            | Number of FOG episodes per hour OFF            | <b>127.57 (66.01-182.97)</b> | <b>221.99 (161.36-307.75)</b> | <b>0.04**</b>   | 159.58 (88.39-222.07) | 195.93 (128.00-320.13) | 0.06 |
| Amount of FOG during supervised FOG-provoking tests (%TF)<br>ON medication | 4-meter walk ON                                | 0.0 (0.0-0.0)                | 0.0 (0.0-0.0)                 | 0.32            | 0.0 (0.0-0.0)         | 0.0 (0.0-0.0)          | 0.32 |
|                                                                            | TUG single task ON                             | <b>0.0 (0.0-0.0)</b>         | <b>0.0 (0.0-6.1)</b>          | <b>0.04</b>     | 0.0 (0.0-1.5)         | 0.0 (0.0-0.0)          | 0.31 |
|                                                                            | TUG with dual task ON                          | 0.0 (0.0-0.0)                | 0.0 (0.0-1.0)                 | 0.19            | 0.0 (0.0-0.0)         | 0.0 (0.0-0.6)          | 0.63 |
|                                                                            | Turning task single task ON                    | <b>0.0 (0.0-7.7)</b>         | <b>35.1 (0.0-66.2)</b>        | <b>0.02**</b>   | 9.9 (0.0-60.2)        | 0.0 (0.0-39.8)         | 0.21 |
|                                                                            | Turning task with dual task ON                 | <b>0.0 (0.0-7.4)</b>         | <b>46.9 (6.6-60.8)</b>        | <b>≤0.001**</b> | 9.3 (0.0-57.5)        | 4.4 (0.0-41.0)         | 0.32 |
|                                                                            | Hotspot narrow space ON                        | 0.0 (0.0-1.2)                | 0.0 (0.0-0.1)                 | 0.87            | 0.0 (0.0-1.5)         | 0.0 (0.0-0.0)          | 0.44 |
|                                                                            | Personal hotspot ON                            | 0.0 (0.0-5.8)                | 1.3 (0.0-5.5)                 | 0.52            | 1.3 (0.0-7.4)         | 0.0 (0.0-4.3)          | 0.40 |
|                                                                            | %TF total provoking protocol ON                | <b>0.6 (0.0-4.6)</b>         | <b>22.2 (3.0-38.4)</b>        | <b>0.01**</b>   | 9.4 (0.0-38.4)        | 1.7 (0.0-10.0)         | 0.12 |
|                                                                            | Number of FOG episodes per hour ON             | <b>25.69 (0.0-118.3)</b>     | <b>197.24 (56.32-265.99)</b>  | <b>0.02</b>     | 157.86 (0.00-226.03)  | 54.67 (0.00-238.71)    | 0.60 |
| Self-report Questionnaires                                                 | New Freezing of Gait Questionnaire             | 20.00 (19.00-23.25)          | 24.00 (20.75-25.25)           | 0.09            | 21.00 (19.00-24.25)   | 30.00 (22.25-37.75)    | 0.51 |
|                                                                            | New Freezing of Gait Questionnaire sub-score 2 | <b>14.00 (12.75-15.25)</b>   | <b>17.00 (15.75-18.00)</b>    | <b>0.02</b>     | 15 (13.75-17.00)      | 16 (13.75-17.25)       | 0.75 |
|                                                                            | Characterising Freezing of Gait Questionnaire  | 25.50 (16.50-36.25)          | 23.50 (17.50-32.25)           | 0.57            | 19.50 (15.00-27.70)   | 23.00 (19.70-25.30)    | 0.51 |

%TF: % time frozen; MDS-UPDRS: Movement Disorders Society-Unified Parkinson's Disease Rating Scale; TUG: Timed Up and Go; OFF: off medication state; ON: on medication state; LEDD: levodopa equivalent daily dose.

\*Table entries are median (25%-75% percentiles). Unadjusted p-values are shown. Those that are still statistically significant after adjusting for multiple comparisons are indicated by \*\*.
